# Supplementary material
Source: Springer Nature journal article supplement (https://www.springermedizin.de/resource/supplementary/12879_2009_1111_MOESM1_ESM.pdf/9441876)

## Start of gastrointestinal symptoms

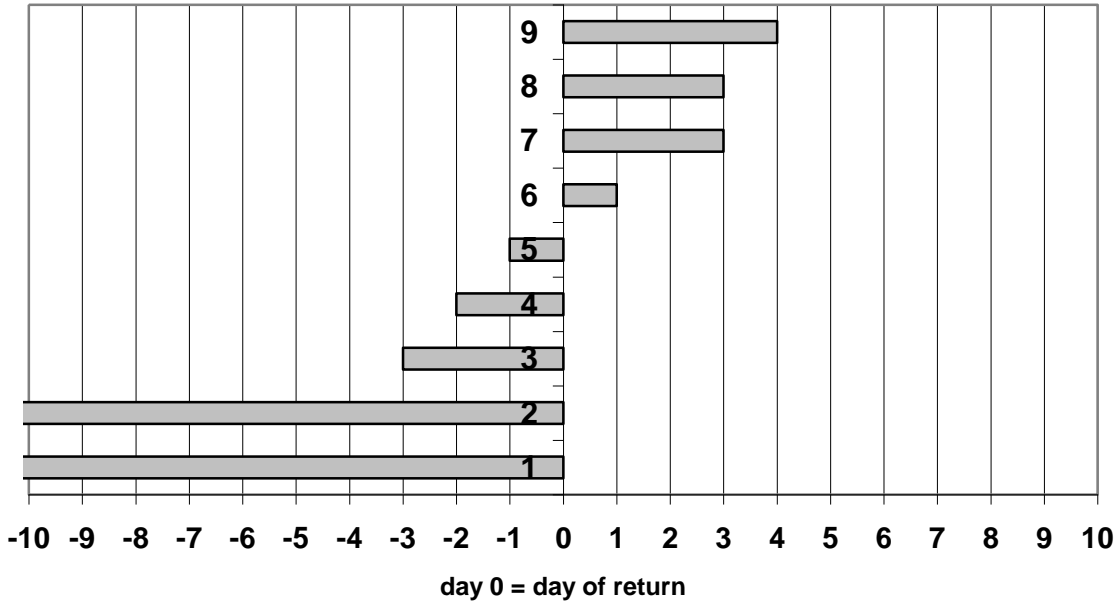

Supplement: MOESM1 [file 9441876]
